# Supplementary material
Source: PubMed Central journal article supplement (PMC5053140)
Supplement: d-72-01137-sup1.pdf [file d-72-01137-sup1.pdf]

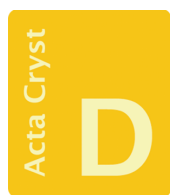

STRUCTURAL  
BIOLOGY

**Volume 72 (2016)**

**Supporting information for article:**

***PRISM-EM*: template interface-based modelling of multi-protein complexes guided by cryo-electron microscopy density maps**

**Guray Kuzu, Ozlem Keskin, Ruth Nussinov and Attila Gursoy**

**Table S1** Scores obtained and templates used in homology modeling

| <b>Protein</b>                       | <b>PDB ID</b> | <b>C-score</b> | <b>Templates</b>                         |
|--------------------------------------|---------------|----------------|------------------------------------------|
| Antibody m36                         | -             | 1.47           | 3ux9B, 3u2sA, 2kh2B, 1igtB, 1yc8A, 1dlfH |
| Acetylcholine-binding protein type 1 | 4aodA         | 1.46           | 3sq6A, 2qc1B, 4aq5B, 2qc1A, 4aoeA        |
| Heavy chain of antibody VRC-PG04     | 3se9H         | 0.96           | 1dfbA, 3mlrH, 1y0lH, 3se8A, 4hsH, 2r56H  |
| Light chain of antibody VRC-PG04     | 3se9L         | 0.94           | 3se8L                                    |
| Lidless Mm-cpn                       | 3iyfA         | 1.86           | 1q3qA, 4aolH, 1a6dA, 3j1bA               |
| Conjugal transfer protein TrwB       | 1e9rA         | 1.53           | 4ag5A                                    |
| Circadian clock protein KaiC         | 3dv1A         | -1.79          | 2dr3D, 2ztsC, 1tf7A                      |

**Table S2** Evaluation of interfaces predicted by *Multifit*

| PDB ID | PDB, interface | Model           | Model, interface | IS-score | Result     |
|--------|----------------|-----------------|------------------|----------|------------|
| 3cre   | AB             | 3cre-model      | AB               | 0.07     | incorrect  |
|        | BC             |                 | BC               | 0.07     | incorrect  |
| 4a6j   | AC             | 4a6j-3mer-model | AB               | 0.10     | incorrect  |
|        |                |                 | BC               | 0.23     | correct    |
| 3se9   | GH             | 3se9-model      | GH               | -        | -          |
|        | HL             |                 | HL               | 0.12     | acceptable |
| 1e9r   | AB             | 1e9r-model      | AB               | 0.08     | incorrect  |
|        |                |                 | BC               | 0.08     | incorrect  |
|        |                |                 | CD               | 0.08     | incorrect  |
|        |                |                 | DE               | 0.08     | incorrect  |
|        |                |                 | EF               | 0.08     | incorrect  |
|        |                |                 | FA               | 0.08     | incorrect  |
| 3dvl   | AB             | 3dvl-model      | AB               | 0.36     | correct    |
|        |                |                 | BC               | 0.36     | correct    |
|        |                |                 | CD               | 0.36     | correct    |
|        |                |                 | DE               | 0.36     | correct    |
|        |                |                 | EF               | 0.36     | correct    |
|        |                |                 | FA               | 0.36     | correct    |

**Table S3** Evaluation of interfaces predicted by *Segger*

| PDB ID | PDB, interface | Model      | Model, interface | IS-score | Result    |
|--------|----------------|------------|------------------|----------|-----------|
| 4aod   | AB             | 4aod-model | AB               | 0.08     | incorrect |
|        |                |            | BC               | 0.08     | incorrect |
|        |                |            | CD               | 0.08     | incorrect |
|        |                |            | DE               | 0.08     | incorrect |
|        |                |            | EA               | 0.08     | incorrect |
| 3iyf   | AB             | 3iyf-model | AB               | -        | -         |
|        |                |            | BC               | -        | -         |
|        |                |            | CD               | 0.33     | correct   |
|        |                |            | DE               | 0.34     | correct   |
|        |                |            | EF               | -        | -         |
|        |                |            | FG               | -        | -         |
|        |                |            | GH               | -        | -         |
| HA     | -              | -          |                  |          |           |

**Table S4** Evaluation of interfaces in the *Multifit* benchmark set

For the cases 1z5sBD predicted by our method and 1z5sAD predicted by *Multifit*, the minimum interface residue number was decreased to 10 (default value: 15) in IS-score calculations.

| PDB ID | Interface | Our predictions |         | <i>Multifit</i> predictions |            |
|--------|-----------|-----------------|---------|-----------------------------|------------|
|        |           | IS-score        | Result  | IS-score                    | Result     |
| 1qu9   | AB        | 0.84            | correct | 0.73                        | correct    |
|        | AC        | 0.84            | correct | 0.73                        | correct    |
|        | BC        | 0.79            | correct | 0.73                        | correct    |
| 1urz   | AB        | 0.76            | correct | 0.85                        | correct    |
|        | AC        | 0.69            | correct | 0.80                        | correct    |
|        | BC        | 0.70            | correct | 0.83                        | correct    |
| 1z5s   | AB        | 0.27            | correct | -                           |            |
|        | AC        | 0.60            | correct | 0.11                        | incorrect  |
|        | AD        | 0.88            | correct | 0.04                        | incorrect  |
|        | BD        | 0.34            | correct | -                           |            |
| 1e6v   | AB        | 0.84            | correct | 0.15                        | acceptable |
|        | AC        | 0.84            | correct | 0.23                        | correct    |
|        | AD        | 0.89            | correct | 0.34                        | correct    |
|        | AE        | 0.85            | correct | 0.09                        | incorrect  |
|        | BC        | 0.90            | correct | 0.34                        | correct    |
|        | BD        | 0.86            | correct | 0.55                        | correct    |
|        | BE        | 0.82            | correct | -                           |            |
|        | DE        | 0.87            | correct | 0.09                        | incorrect  |
|        | DF        | 0.85            | correct | -                           |            |
| EF     | 0.91      | correct         | -       |                             |            |
| 1mty   | BC        | 0.84            | correct | 0.74                        | correct    |
|        | BD        | 0.92            | correct | 0.66                        | correct    |
|        | BG        | 0.82            | correct | 0.49                        | correct    |
|        | CE        | 0.89            | correct | 0.49                        | correct    |
|        | CH        | 0.82            | correct | 0.46                        | correct    |
|        | DE        | 0.85            | correct | 0.28                        | correct    |
|        | DG        | 0.86            | correct | 0.39                        | correct    |
|        | EH        | 0.89            | correct | 0.43                        | correct    |
| 1tyq   | AB        | 0.48            | correct | -                           |            |
|        | AD        | 0.84            | correct | 0.21                        | correct    |
|        | AE        | 0.76            | correct | -                           |            |
|        | BF        | 0.86            | correct | -                           |            |
|        | BG        | 0.55            | correct | -                           |            |
|        | CF        | 0.77            | correct | -                           |            |
|        | CG        | 0.64            | correct | -                           |            |
|        | DF        | 0.87            | correct | 0.10                        | incorrect  |
| 1oel   | AB        | 0.78            | correct | 0.51                        | correct    |

|      |    |      |         |      |         |
|------|----|------|---------|------|---------|
|      | BC | 0.79 | correct | 0.56 | correct |
|      | CD | 0.66 | correct | 0.52 | correct |
|      | DE | 0.88 | correct | 0.51 | correct |
|      | EF | 0.80 | correct | 0.54 | correct |
|      | FG | 0.75 | correct | 0.52 | correct |
|      | GA | 0.80 | correct | 0.51 | correct |
| 1gru | AB | 0.80 | correct | 0.35 | correct |
|      | BC | 0.81 | correct | 0.34 | correct |
|      | CD | 0.78 | correct | 0.33 | correct |
|      | DE | 0.79 | correct | 0.33 | correct |
|      | EF | 0.71 | correct | 0.33 | correct |
|      | FG | 0.75 | correct | 0.33 | correct |
|      | GA | 0.49 | correct | 0.35 | correct |

**Table S5** Predictions of HADDOCK-EM set

| Complex | Template | Query Proteins |       | Fiberdock energy |
|---------|----------|----------------|-------|------------------|
| 1avx    | 1avwAB   | 2a31A          | 1avwB | -67.78           |
| 2oul    | 3e1zAB   | 2nnrA          | 3bpfA | -45.59           |
| 1ay7    | 1b27AD   | 1lniA          | 3da7C | -40.49           |
| 7cei    | 2jb0AB   | 1ayiA          | 1m08A | -22.33           |
| 2oob    | 2oobAB   | 2ooaB          | 4xofA | -15.79           |
| 2fd6    | 3bt2HU   | 2fatH          | 3bt2U | -17.80           |
| 1ak4    | 1m9eBC   | 2cplA          | 4j93A | -30.50           |
| 1b6c    | 3h9rAB   | 1iasA          | 1d6oA | -34.03           |
| 1bgx    | 1bgxHT   | 1ay1H          | 1tauA | -20.20           |
| 1r6q    | 1r6oAC   | 1mg9B          | 1mbvB | -40.8            |
| 1m10    | 1u0nAD   | 1fnsA          | 4c2aB | -18.45           |
| 1acb    | 1h9hEI   | 1p2nA          | 1eglA | -17.29           |
| 1jk9    | 1pu0CD   | 1qupB          | 1b4tA | -15.24           |
| 1bkd    | 1nvuRS   | 4nymR          | 4us0S | -103.86          |
| 1jmo    | 1tbqHR   | 1dm4B          | 1jmjA | -13.20           |

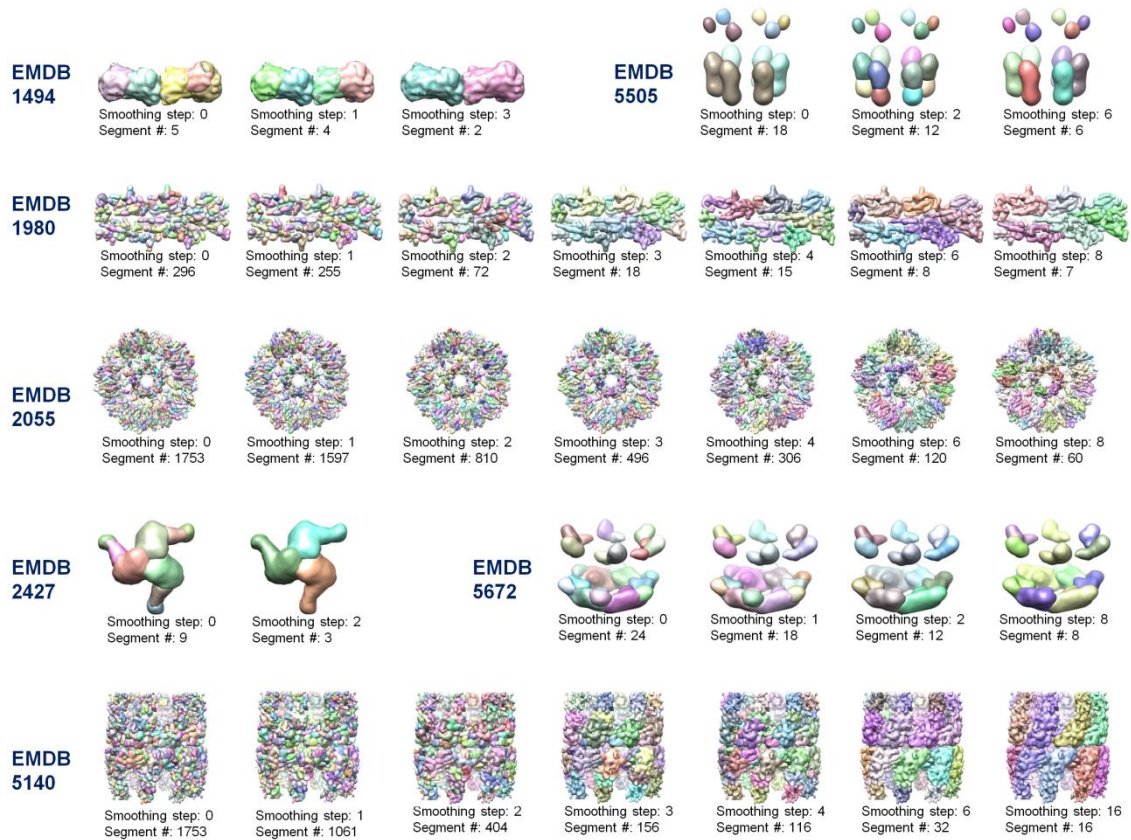

**Figure S1** Results of segmentation by *Segger*. *Segger* gives different segmentation for different smoothing step number. Smoothing step and segment numbers are given below each figure. Figures obtained with different smoothing step number but giving the same result are not shown here; for example, smoothing step 2 gave the same result as smoothing step 1. We could obtain proper segmentation for EMDB IDs 2055 and 5140. We could obtain desired number of segments for EMDB IDs 1980, 5505 and 5672, but segmentation was not properly. Using different contour level of density maps did not change the segmentation.

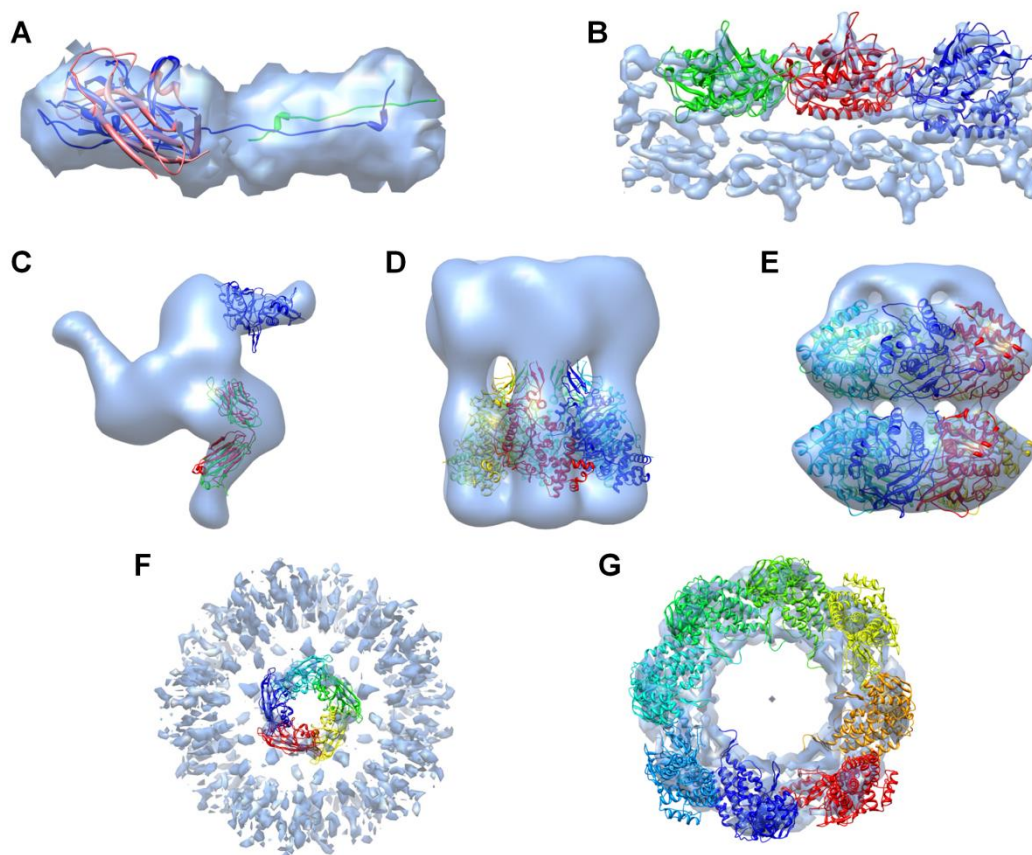

**Figure S2** Models obtained by using *Multifit* and *Segger*. Models are fitted into EM density maps. Chains are given in different colors. (A) *Multifit* model of Saf Pilus fitted into EMDB ID 1494. (B) *Multifit* model of ParM filament fitted into EMDB ID 1980. (C) *Multifit* model of HIV-1 gp120/VRC-PG04 complex fitted into EMDB ID 2427. (D) *Multifit* model of conjugal transfer protein TrwB fitted into EMDB ID 5505. (E) *Multifit* model of circadian clock protein KaiC fitted into EMDB ID 5672. (F) *Segger* model of acetylcholine-binding protein type 1 fitted into EMDB ID 2055. (G) *Segger* model of lidless Mm-cpn fitted into EMDB ID 5140.
